# Supplementary material for: Genomic and Phenotypic Characteristics in Geographically Separated Clinical Campylobacter jejuni ST353CC Isolates
Source: MDPI journal article supplement (doi:10.3390/microorganisms9122540), 2021-12-08

## Supplementary material

**Table S1.** Screening of putative virulence genes in *C. jejuni* ST353CC isolates sequenced in this study. Compared to *C. jejuni* reference strains 11168 (GenBank AL111168.1), 81-176 (GenBank \*CP000538.1 (chromosome) and \*\*AY394561.1 (pTet plasmid), and 108 (Genbank #JX436460.1).

| Function             | Gene annotation in 11168, 81-176*/** or 108 <sup>#</sup> |                                                                                   | Analysis of 353CC isolates |                           |                                       |
|----------------------|----------------------------------------------------------|-----------------------------------------------------------------------------------|----------------------------|---------------------------|---------------------------------------|
|                      | Locus tag                                                | Gene name                                                                         | Present in all isolates    | Not found in any isolates | Differences                           |
| Capsule biosynthesis | cj1413c                                                  | <i>kpsS</i> , capsule polysaccharide modification protein                         | ✓                          |                           |                                       |
|                      | cj1414c                                                  | <i>kpsC</i> , capsule polysaccharide modification protein                         | ✓                          |                           |                                       |
|                      | cj1415c                                                  | <i>cysC</i> , putative adenylylsulfate kinase                                     | ✓                          |                           |                                       |
|                      | cj1423c                                                  | <i>hddC1</i> , putative D-glycero-D-manno-heptose 1-phosphate guanosyltransferase |                            |                           | Present in B30, B31 and B44           |
|                      | cj1424c                                                  | <i>gmhA2</i> , phosphoheptose isomerase                                           |                            | ✓                         |                                       |
|                      | cj1425c                                                  | <i>hddA</i> , putative D-glycero-D-manno-heptose 7-phosphate kinase               |                            |                           | Present in E00, E79, B30, B31 and B44 |
|                      | cj1428c                                                  | <i>fcl</i> , GDP-L-fucose synthetase                                              |                            | ✓                         |                                       |
|                      | cj1430c                                                  | <i>rfbC</i> , putative dTDP-4-dehydrorhamnose 3,5-epimerase                       |                            |                           | Present in B30, B31 and B44           |
|                      | cj1431c                                                  | <i>hddC2</i> , capsular polysaccharide heptosyltransferase                        |                            | ✓                         |                                       |
|                      | cj1439c                                                  | <i>glf</i> , UDP-galactopyranose mutase                                           |                            | ✓                         |                                       |
|                      | cj1441c                                                  | <i>kfiD</i> , UDP-glucose 6-dehydrogenase                                         |                            | ✓                         |                                       |
|                      | cj1443c                                                  | <i>kpsF</i> , D-arabinose 5-phosphate isomerase                                   | ✓                          |                           |                                       |
|                      | cj1444c                                                  | <i>kpsD</i> , capsule polysaccharide export system periplasmic protein            | ✓                          |                           |                                       |
|                      | cj1445c                                                  | <i>kpsE</i> , capsule polysaccharide export system inner membrane protein         | ✓                          |                           |                                       |
|                      | cj1447c                                                  | <i>kpsT</i> , capsule polysaccharide export ATP-binding protein                   | ✓                          |                           |                                       |
|                      | cj1448c                                                  | <i>kpsM</i> , capsule polysaccharide export system inner membrane protein         | ✓                          |                           |                                       |
| Motility and         | cj0041                                                   | <i>fliK</i> , putative flagellar hook-length control protein                      | ✓                          |                           |                                       |
|                      | cj0042                                                   | <i>flgD</i> , putative flagellar hook assembly protein                            | ✓                          |                           |                                       |

|            |         |                                                                                   |   |
|------------|---------|-----------------------------------------------------------------------------------|---|
| chemotaxis | cj0043  | <i>flgE</i> , flagellar hook protein                                              | ✓ |
|            | cj0059c | <i>fliY</i> , putative flagellar motor switch protein                             | ✓ |
|            | cj0060c | <i>fliM</i> , flagellar motor switch protein                                      | ✓ |
|            | cj0061c | <i>fliA</i> , RNA polymerase sigma factor for flagellar operon                    | ✓ |
|            | cj0063c | <i>flhG</i> , flagellar biosynthesis protein, ATPase                              | ✓ |
|            | cj0064c | <i>flhF</i> , flagellar biosynthesis protein                                      | ✓ |
|            | cj0195  | <i>fliI</i> , flagellum-specific ATP synthase                                     | ✓ |
|            | cj0283c | <i>cheW</i> , chemotaxis protein                                                  | ✓ |
|            | cj0284c | <i>cheA</i> , chemotaxis histidine kinase                                         | ✓ |
|            | cj0285c | <i>cheV</i> , chemotaxis protein                                                  | ✓ |
|            | cj0318  | <i>fliF</i> , flagellar M-ring protein                                            | ✓ |
|            | cj0319  | <i>fliG</i> , flagellar motor switch protein                                      | ✓ |
|            | cj0320  | <i>fliH</i> , putative flagellar assembly protein                                 | ✓ |
|            | cj0335  | <i>flhB</i> , flagellar biosynthesis protein                                      | ✓ |
|            | cj0336c | <i>motB</i> , putative flagellar motor protein                                    | ✓ |
|            | cj0337c | <i>motA</i> , putative flagellar motor proton channel                             | ✓ |
|            | cj0351  | <i>fliN</i> , flagellar motor switch protein                                      | ✓ |
|            | cj0448c | <i>acfB</i> , accessory colonisation factor, MCP-type signal transduction protein | ✓ |
|            | cj0526c | <i>fliE</i> , flagellar hook-basal body complex protein                           | ✓ |
|            | cj0527c | <i>flgC</i> , flagellar basal body rod protein                                    | ✓ |
|            | cj0528c | <i>flgB</i> , flagellar basal body rod protein                                    | ✓ |
|            | cj0547  | <i>flaG</i> , flagellar protein                                                   | ✓ |
|            | cj0548  | <i>fliD</i> , flagellar hook-associated protein                                   | ✓ |
|            | cj0549  | <i>fliS</i> , flagellar protein                                                   | ✓ |
|            | cj0670  | <i>rpoN</i> , RNA polymerase sigma-54 factor                                      | ✓ |
|            | cj0687c | <i>flgH</i> , putative flagellar L-ring protein precursor                         | ✓ |
|            | cj0697  | <i>flgG2</i> , <i>flgF</i> , flagellar basal-body rod protein                     | ✓ |
|            | cj0698  | <i>flgG</i> , <i>flgG</i> , flagellar basal-body rod protein                      | ✓ |
|            | cj0720  | <i>flaC</i> , flagellin                                                           | ✓ |

|          |         |                                                                    |   |                |
|----------|---------|--------------------------------------------------------------------|---|----------------|
|          | cj0769c | <i>flgA</i> , putative flagellar protein                           | ✓ |                |
|          | cj0793  | <i>flgS</i> , signal transduction histidine kinase                 | ✓ |                |
|          | cj0820c | <i>fliP</i> , flagellar biosynthesis protein                       | ✓ |                |
|          | cj0882c | <i>flhA</i> , flagellar biosynthesis protein                       | ✓ |                |
|          | cj0887c | <i>flaD</i> , <i>flgL</i> , flagellar hook-associated protein      | ✓ |                |
|          | cj0923c | <i>cheR</i> , putative MCP protein methyltransferase               | ✓ |                |
|          | cj0924c | <i>cheB</i> , putative MCP protein-glutamate methylesterase        | ✓ |                |
|          | cj1024c | <i>flgR</i> , sigma-54 associated transcriptional activator        | ✓ |                |
|          | cj1118c | <i>cheY</i> , chemotaxis regulatory protein                        | ✓ |                |
|          | cj1179c | <i>fliR</i> , flagellar biosynthesis protein                       | ✓ |                |
|          | cj1189c | <i>cetB</i> , bipartate energy taxis response protein              | ✓ |                |
|          | cj1198  | <i>luxS</i> , S-ribosylhomocysteine lyase                          | ✓ |                |
|          | cj1190c | <i>cetA</i> , bipartate energy taxis response protein              | ✓ |                |
|          | cj1312  | <i>pseG</i> , nucleotidase                                         | ✓ |                |
|          | cj1313  | <i>pseH</i> , N-acetyltransferase                                  | ✓ |                |
|          | cj1331  | <i>ptmB</i> , acylneuraminate cytidylyltransferase                 | ✓ |                |
|          | cj1332  | <i>ptmA</i> , putative oxidoreductase                              | ✓ |                |
|          | cj1338c | <i>flaB</i> , flagellin                                            |   | Missing in E00 |
|          | cj1339c | <i>flaA</i> , flagellin                                            |   | Missing in E00 |
|          | cj1408  | <i>fliL</i> , putative flagellar protein                           | ✓ |                |
|          | cj1462  | <i>flgI</i> , flagellar P-ring protein                             | ✓ |                |
|          | cj1466  | <i>flgK</i> , putative flagellar hook-associated protein           | ✓ |                |
|          | cj1506c | <i>tlpI</i> , putative MCP-type signal transduction protein        | ✓ |                |
|          | cj1565c | <i>pflA</i> , paralysed flagellum protein                          | ✓ |                |
|          | cj1675  | <i>fliQ</i> , flagellar biosynthesis protein                       | ✓ |                |
|          | cj1729c | <i>flgE2</i> , flagellar hook subunit protein                      | ✓ |                |
| adhesion | cj0289c | <i>peb3</i> , major antigenic peptide                              | ✓ |                |
|          | cj0921c | <i>peb1A</i> , aspartate/glutamate-binding ABC transporter protein | ✓ |                |
|          | cj0983  | <i>jlpA</i> , surface-exposed adhesin                              |   | Missing in E00 |

|                  |                |                                                                                 |   |                             |
|------------------|----------------|---------------------------------------------------------------------------------|---|-----------------------------|
|                  | cj1259         | <i>porA</i> , major outer membrane protein                                      | ✓ |                             |
|                  | cj1279c        | <i>flpA</i> , putative fibronectin domain-containing lipoprotein                | ✓ |                             |
|                  | cj1351         | <i>pldA</i> , phospholipase A                                                   | ✓ |                             |
|                  | cj1478c        | <i>cadF</i> , outer membrane fibronectin-binding protein                        | ✓ |                             |
|                  | *CJJ81176_0067 | <i>ggt</i> , gamma-glutamyltransferase                                          |   | ✓                           |
| invasion         | cj0914c        | <i>ciaB</i> , invasion antigen B                                                | ✓ |                             |
|                  | cj1647         | <i>iamA</i> , putative ABC transport system ATP-binding protein                 | ✓ |                             |
| stress response  | cj0012c        | <i>rrc</i> , non-haem iron protein                                              | ✓ |                             |
|                  | cj0020c        | cytochrome C551 peroxidase                                                      | ✓ |                             |
|                  | cj0334         | <i>ahpC</i> , alkyl hydroperoxide reductase                                     | ✓ |                             |
|                  | cj0358         | putative cytochrome C551 peroxidase                                             | ✓ |                             |
|                  | cj0779         | <i>tpx</i> , thiol peroxidase                                                   | ✓ |                             |
|                  | cj1260c        | <i>dnaJ</i> , chaperone                                                         | ✓ |                             |
|                  | cj1272c        | <i>spoT</i> , putative guanosine-3',5'-bis(diphosphate) 3'-pyrophosphohydrolase | ✓ |                             |
|                  | cj1385         | <i>katA</i> , catalase                                                          | ✓ |                             |
|                  | *CJJ81176_1121 | <i>csrA</i> , carbon storage regulator                                          | ✓ |                             |
| iron acquisition | cj0178         | putative TonB-dependent outer membrane receptor                                 | ✓ |                             |
|                  | cj0755         | <i>cfrA</i> , ferric enterobactin uptake receptor                               | ✓ |                             |
|                  | cj1355         | <i>ceuE</i> , enterochelin uptake periplasmic binding protein                   | ✓ |                             |
|                  | cj1614         | <i>chuA</i> , haemin uptake system outer membrane receptor                      | ✓ |                             |
| toxin            | cj0077c        | <i>cdtC</i> , cytolethal distending toxin C                                     | ✓ |                             |
|                  | cj0078c        | <i>cdtB</i> , cytolethal distending toxin B                                     | ✓ |                             |
|                  | cj0079c        | <i>cdtA</i> , cytolethal distending toxin A                                     | ✓ |                             |
| type IV          | **             | <i>cmgB4</i> , putative type IV secretion system component, <i>virB4</i>        |   | Present in B30, B31 and B44 |
| secretion        | **             | <i>cmgB5</i> , putative type IV secretion system component, <i>virB5</i>        |   | “                           |
| system           | **             | <i>cmgB6</i> , putative type IV secretion system component, <i>virB6</i>        |   | “                           |
| (T4SS)           | **             | <i>cmgB7</i> , putative type IV secretion system component, <i>virB7</i>        |   | “                           |
|                  | **             | <i>cmgB8</i> , putative type IV secretion system component, <i>virB8</i>        |   | “                           |
|                  | **             | <i>cmgB9</i> , putative type IV secretion system component, <i>virB9</i>        |   | “                           |

|                                          |                |                                                                            |   |   |                    |
|------------------------------------------|----------------|----------------------------------------------------------------------------|---|---|--------------------|
|                                          | **             | <i>cmgB10</i> , putative type IV secretion system component, <i>virB10</i> |   |   | “                  |
|                                          | **             | <i>cmgB11</i> , putative type IV secretion system component, <i>virB11</i> |   |   | “                  |
|                                          | **             | <i>cmgD4</i> , putative type IV secretion system component, <i>virD4</i>   |   |   | “                  |
|                                          | **pTet         | pTet plasmid                                                               |   |   | “                  |
|                                          | ** <i>tetO</i> | <i>tetO</i> , tetracyclin resistance gene                                  | ✓ |   |                    |
| type VI<br>secretion<br>system<br>(T6SS) | #              | <i>tssA</i> , <i>VasJ</i>                                                  | ✓ |   |                    |
|                                          | #              | <i>tssB</i> , <i>VipA</i>                                                  | ✓ |   |                    |
|                                          | #              | <i>tssC</i> , <i>VipB</i>                                                  | ✓ |   |                    |
|                                          | #              | <i>tssD</i> , <i>Hcp</i>                                                   | ✓ |   |                    |
|                                          | #              | <i>tssE</i>                                                                | ✓ |   |                    |
|                                          | #              | <i>tssF</i> , <i>VasA</i>                                                  | ✓ |   |                    |
|                                          | #              | <i>tssG</i> , <i>VasB</i>                                                  | ✓ |   |                    |
|                                          | #              | <i>tagH</i> , <i>VasC</i>                                                  | ✓ |   |                    |
|                                          | #              | <i>tssI</i> , <i>VgrG</i>                                                  | ✓ |   |                    |
|                                          | #              | <i>tssJ</i> , <i>VasD</i>                                                  | ✓ |   |                    |
|                                          | #              | <i>tssK</i> , <i>VasE</i>                                                  | ✓ |   |                    |
|                                          | #              | <i>tssL</i>                                                                | ✓ |   |                    |
|                                          | #              | <i>tssM</i>                                                                | ✓ |   |                    |
| LOS class                                | A              |                                                                            |   | ✓ |                    |
|                                          | B              |                                                                            |   |   | E38, E01, E03,     |
|                                          | C              |                                                                            |   | ✓ |                    |
|                                          | D              |                                                                            |   |   | E79                |
|                                          | E              |                                                                            |   |   | E00, B30, B31, B44 |
|                                          | F              |                                                                            |   | ✓ |                    |

---

**Table S2.** Results from comparative genomic analyses identifying genes unique for *C. jejuni* ST353CC isolates of different sequence types.

| Annotation from BLAST of protein sequence                                                 | COG                                                               |
|-------------------------------------------------------------------------------------------|-------------------------------------------------------------------|
| <b>Unique genes for ST-9438 isolates</b>                                                  |                                                                   |
| PseF, pseudaminic acid cytidyltransferase, CMP-N-acetylneuraminic acid synthetase         | [M] Cell wall/membrane/envelope biogenesis                        |
| restriction endonuclease subunit S, type I SS modification system specificity (S) subunit | [V] Defence mechanisms                                            |
| class I SAM-dependent methyltransferase                                                   | [H] Coenzyme transport and metabolism                             |
| dihydroorotase, pyrimidine biosynthesis                                                   | [F] Nucleotide transport and metabolism                           |
| YeeE/YedE family protein, uncharacterized membrane protein                                | [R] General function prediction only                              |
| peptidase C39                                                                             | [R] General function prediction only                              |
| HmcD domain-containing protein                                                            | [C] Energy production and conversion                              |
| relaxase/mobilisation nuclease domain-containing protein                                  | [X] Mobilome: prophages, transposons                              |
| NTPase                                                                                    | [F] Nucleotide transport and metabolism                           |
| protein kinase family protein                                                             | [T] Signal transduction mechanisms                                |
| RadB, RecA-family ATPase                                                                  | [L]* Replication, recombination and repair                        |
| resolvase, site-specific DNA recombinase                                                  | [L]* Replication, recombination and repair                        |
| VirB4, type IV secretion system conjugal transfer ATPase                                  | [U] Intracellular trafficking, secretion, and vesicular transport |
| Rha family transcriptional regulator                                                      | [X] Mobilome: prophages, transposons                              |
| single-stranded DNA-binding protein                                                       | [L]* Replication, recombination and repair                        |
| VirB5, type IV secretion system P-type DNA transfer protein                               | [U] Intracellular trafficking, secretion, and vesicular transport |
| VirB6, type IV secretion system plasmid conjugal transfer protein                         | [U] Intracellular trafficking, secretion, and vesicular transport |
| VirB8, type IV secretion system DNA transporter protein                                   | [U] Intracellular trafficking, secretion, and vesicular transport |
| VirB9, type IV secretion system P-type conjugative transfer protein                       | [U] Intracellular trafficking, secretion, and vesicular transport |
| VirB10, type IV secretion system protein                                                  | [U] Intracellular trafficking, secretion, and vesicular transport |
| VirB11, type IV secretion system P-type DNA transfer ATPase                               | [U] Intracellular trafficking, secretion, and vesicular transport |
| VirD4, type IV secretion system conjugative DNA transfer protein, TraG/TraD family ATPase | [U] Intracellular trafficking, secretion, and vesicular transport |
| type IV secretion system protein                                                          | [U] Intracellular trafficking, secretion, and vesicular transport |
| TrbM, conjugal transfer protein                                                           | [U] Intracellular trafficking, secretion, and vesicular transport |
| DNA topoisomerase III                                                                     | [L]* Replication, recombination and repair                        |

chaperone of the DnaK-DnaJ-GrpE chaperone system  
repA, plasmid replication protein  
ParA family protein implicated in chromosome segregation  
type I restriction modification system DNA methylase  
GNAT family N-acetyltransferase

**Unique genes for ST-9336, ST-9437 and ST-3515 isolates**

TnpV, transposon-encoded protein  
MerR family of transcription regulatory protein  
transposase  
class I SAM-dependent methyltransferase  
DNA methyltransferase  
dihydroorotase

[E] Protein fate, Protein folding and stabilization  
[L]\* Replication, recombination and repair  
[L]\* Replication, recombination and repair  
[V] Defense mechanisms  
[G] Carbohydrate transport and metabolism

[X] Mobilome: prophages, transposons  
[K] Transcription  
[X] Mobilome: prophages, transposons  
[H] Coenzyme transport and metabolism  
[R] General function prediction only  
[F]\* Nucleotide transport and metabolism

---

\*Involved in information storage and processing

**Figure S1.** BRIG analysis of plasmids identified in *C. jejuni* ST353CC isolates B30, B31 and B44 (all ST-9438) compared to the pTet plasmid from *C. jejuni* 81-176. Outer ring shows consensus sequence with arrows indicating ORFs.

Figure S1

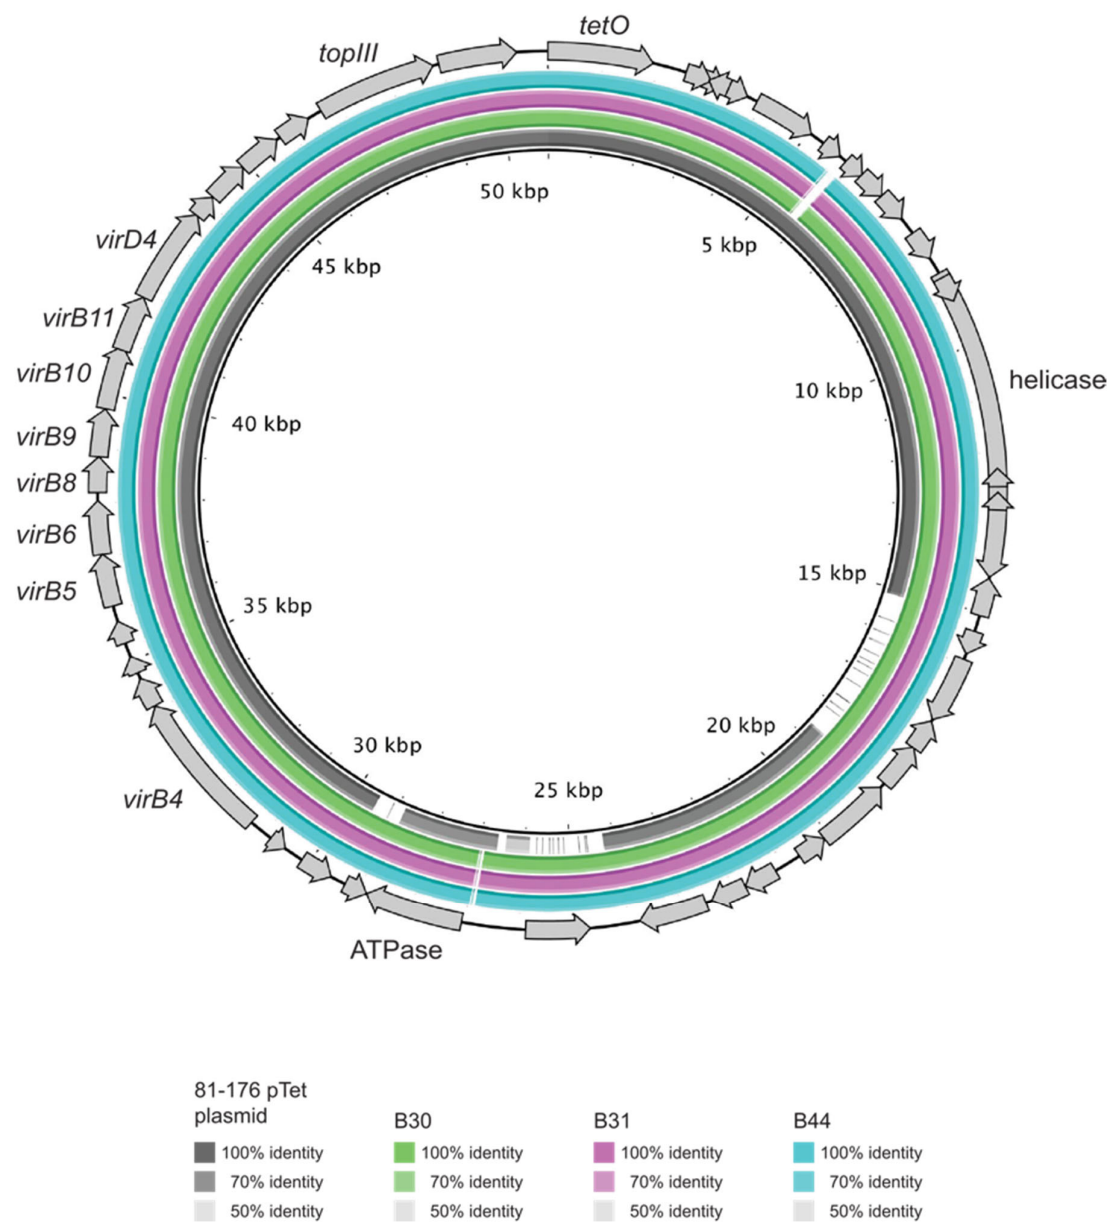



**Figure S2.** Chromosomal location of a 2862 nucleotide long fragment containing the tetO gene in non-ST-9438 isolates. The integration site contains several citrate transporters and is here theoretically demonstrated in the *C. jejuni* 11168 reference strain genome.

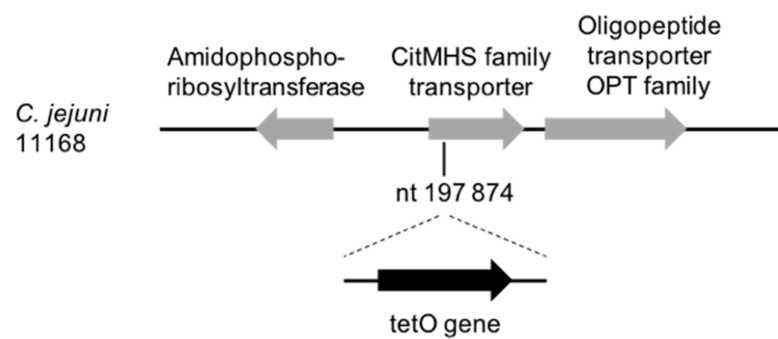

Supplement: s1 [file s1]
